# Supplementary material for: Strong export of Antarctic Bottom Water east of the Kerguelen plateau
Source: Springer Nature journal article supplement (doi:10.1038/ngeo842), 2010-04-25
Supplement: 41561_2010_BFngeo842_MOESM163_ESM.pdf [file 41561_2010_BFngeo842_MOESM163_ESM.pdf]

Supplementary Information for  
**Strong export of Antarctic Bottom Water  
east of the Kerguelen Plateau**

Y. FUKAMACHI<sup>1\*</sup>, S. R. RINTOUL<sup>2,3,4</sup>, J. A. CHURCH<sup>2,3,4</sup>, S. AOKI<sup>1</sup>,  
S. SOKOLOV<sup>2,3,4</sup>, M. A. ROSENBERG<sup>4</sup>, AND M. WAKATSUCHI<sup>1</sup>

<sup>1</sup>Institute of Low Temperature Science, Hokkaido University, Sapporo 060-0819, Japan

<sup>2</sup>Centre for Australian Weather and Climate Research—a partnership of  
the Bureau of Meteorology and CSIRO, Hobart, Tasmania 7000, Australia

<sup>3</sup>Wealth from Oceans Flagship, Hobart, Tasmania 7000, Australia

<sup>4</sup>Antarctic Climate and Ecosystem Cooperative Research Centre,  
Hobart, Tasmania 7001, Australia

**Supplementary Table 1:** Maximum observed mean speeds in deep western boundary currents at depths greater than 3000 m, for which time-series measurements of at least one year in length exist. Also shown are those of deep channel flows (indicated by asterisk) for comparison. Water mass abbreviations: Antarctic Bottom Water (AABW), Weddell Sea Bottom Water (WSBW), Circumpolar Deep Water (CDW), North Atlantic Deep Water (NADW).

| Location                              | Water mass | Max. mean speed (cm s <sup>-1</sup> ) | Depth (m) | Duration (days) | Reference                        |
|---------------------------------------|------------|---------------------------------------|-----------|-----------------|----------------------------------|
| Kerguelen DWBC                        | AABW       | 23.6                                  | 3461      | 699             | This paper                       |
| North of Falklands                    | AABW       | 10-15                                 | ~5500     | 409             | Ref. 8: Whitworth et al. (1991)  |
| Northwest Weddell Sea                 | WSBW       | 6.3                                   | 3474      | 688             | Ref. 11: Fahrbach et al. (2001)  |
| South Pacific DWBC                    | CDW        | 9.6                                   | 5134      | 663             | Ref. 31: Whitworth et al. (1999) |
| Hunter Channel (South Atlantic 34°S)* | AABW       | 7.1                                   | 4175      | 518             | Ref. 32: Zenk et al. (1999)      |
| Vema Channel (South Atlantic 31.1°S)* | AABW       | 33.7                                  | 4425      | 692             | Ref. 33: Hogg et al. (1999)      |
| North Atlantic (42°N)                 | NADW       | 9.3                                   | 4200      | 2 yrs           | Ref. 19: Schott et al. (2006)    |
| North Atlantic (26.5°N)               | NADW       | 13.9                                  | 3080      | 1552            | Ref. 18: Bryden et al. (2005)    |
| North Atlantic (26.5°N)               | NADW       | ~ 14                                  | 4000      | ~385            | Ref. 24 Johns et al. (2008)      |

**Supplementary Table 2:** Northwestward transport of AABW ( $\theta < 0^\circ\text{C}$ ; in Sv) in the Kerguelen DWBC. The WOCE I8S section (green dots, Fig. 1b) crossed the DWBC downstream of the moored array. The other sections were aligned with the moored array. For the WOCE I8S section, shipboard ADCP (SADCP) and lowered ADCP (LADCP) estimates were obtained by referencing geostrophic calculations to SADCP and LADCP measurements, respectively. Other LADCP estimates are obtained without geostrophic calculations. Mooring estimates during the concurrent cruises are based on the data around the CTD/LADCP measurements except that most of the CTD/LADCP observations on the deployment cruise were completed several days prior to the mooring deployment.

| Voyage                  | Date                | SADCP    | LADCP    | Moorings                     |
|-------------------------|---------------------|----------|----------|------------------------------|
| WOCE I8S <sup>3</sup>   | Dec 1994 – Jan 1995 | 15.0±3.2 | 26.0±4.4 |                              |
| Mooring deployment      | Feb 2003            |          | 9.0      | 15.2                         |
| BEAGLE2003 <sup>6</sup> | Feb 2004            | 18.5     | 20.4     | 20.5                         |
| Mooring recovery        | Jan 2005            |          | 17.4     | 16.8                         |
|                         |                     |          |          |                              |
| Two-year mean           | Feb 2003 – Jan 2005 |          |          | 12.3±1.2<br>(std. dev.: 5.6) |

### Supplementary Information References

31. Whitworth III, T. et al. On the deep western-boundary current in the Southwest Pacific Basin. *Prog. Oceanogr.* **43**, 1-54 (1999).
32. Zenk, W., Siedler, G. & Lenz, B. Antarctic Bottom Water flow through the Hunter Channel. *J. Phys. Oceanogr.* **29**, 2785-2801 (1999).
33. Hogg, N., Siedler, G. & Zenk, W. Circulation and variability at the southern boundary of the Brazil Basin. *J. Phys. Oceanogr.* **29**, 145-157 (1999).
